# Supplementary material for: Treatment of Erythroid Precursor Cells from β-Thalassemia Patients with Cinchona Alkaloids: Induction of Fetal Hemoglobin Production
Source: MDPI journal article supplement (doi:10.3390/ijms222413433), 2021-12-14
Supplement: s1 [file s1]

# **Treatment of erythroid precursor cells from $\beta$ -thalassemia patients with cinchona alkaloids: induction of fetal hemoglobin production**

Zuccato C.<sup>1</sup>, Cosenza L.C.<sup>1</sup>, Zurlo M.<sup>1</sup>, Lampronti I.<sup>1,2</sup>, Borgatti M.<sup>1,2</sup>, Chiara Scapoli<sup>3</sup>,  
Gambari R.<sup>1,2,4,\*</sup>, Finotti A.<sup>1,2,4,\*</sup>

<sup>1</sup>Department of Life Sciences and Biotechnology, Section of Biochemistry and Molecular Biology, University of Ferrara, 44121, Ferrara, Italy

<sup>2</sup>Thal-LAB, Research Laboratory “Elio Zago” on the Pharmacologic and Pharmacogenomic Therapy of Thalassemia; University of Ferrara, 44121, Ferrara, Italy

<sup>3</sup>Department of Life Sciences and Biotechnology, Section of Biology and Evolution, University of Ferrara, 44121, Ferrara, Italy

<sup>4</sup>Interuniversity Consortium for Biotechnology (C.I.B.), 34148 Trieste, Italy

\*Corresponding authors:

Alessia Finotti, Department of Life Sciences and Biotechnology, Section of Biochemistry and Molecular Biology, Ferrara University, Italy. E-mail: [alessia.finotti@unife.it](mailto:alessia.finotti@unife.it)

Roberto Gambari, Department of Life Sciences and Biotechnology, Section of Biochemistry and Molecular Biology, Ferrara University, Italy. E-mail: [gam@unife.it](mailto:gam@unife.it)

## **SUPPLEMENTARY MATERIALS**

## Supplementary Figures

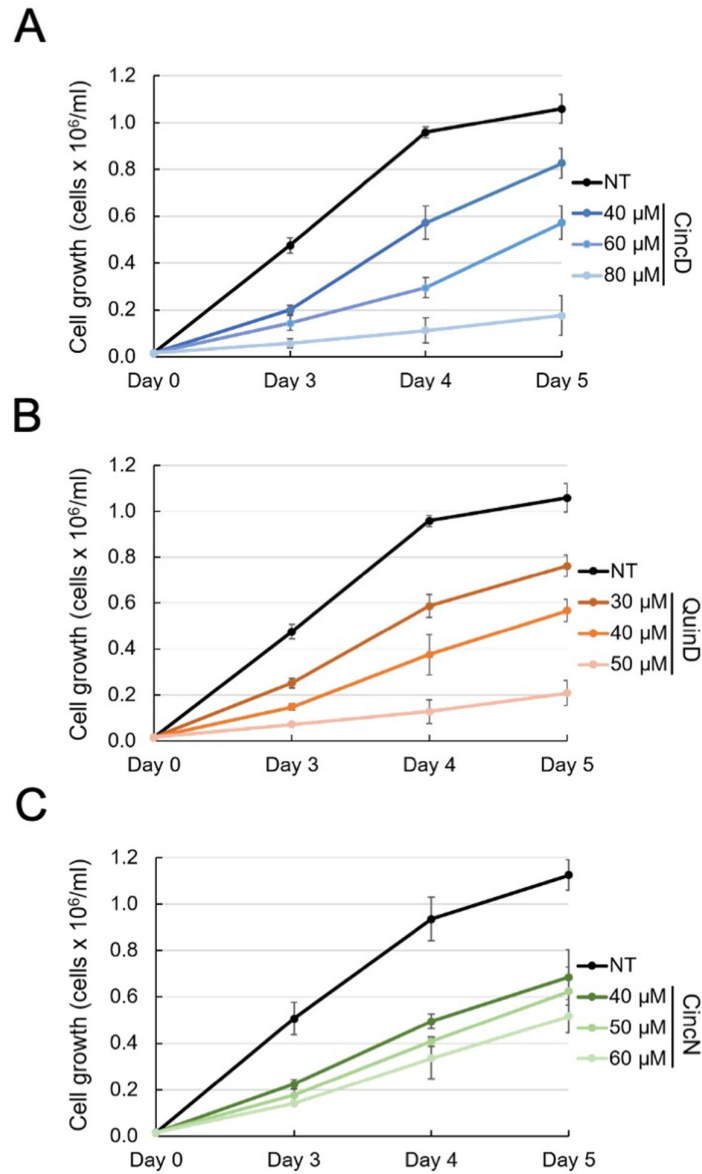

**Figure S1. Effects of cinchonidine, quinidine and cinchonine on in vitro proliferation of K562 cells.** K562 cells have been cultured in the absence or in the presence of the indicated concentrations of cinchonidine (**A**), quinidine (**B**) and cinchonine (**C**) and the number of cells/ml was determined using a Coulter Counter. NT = untreated cells.

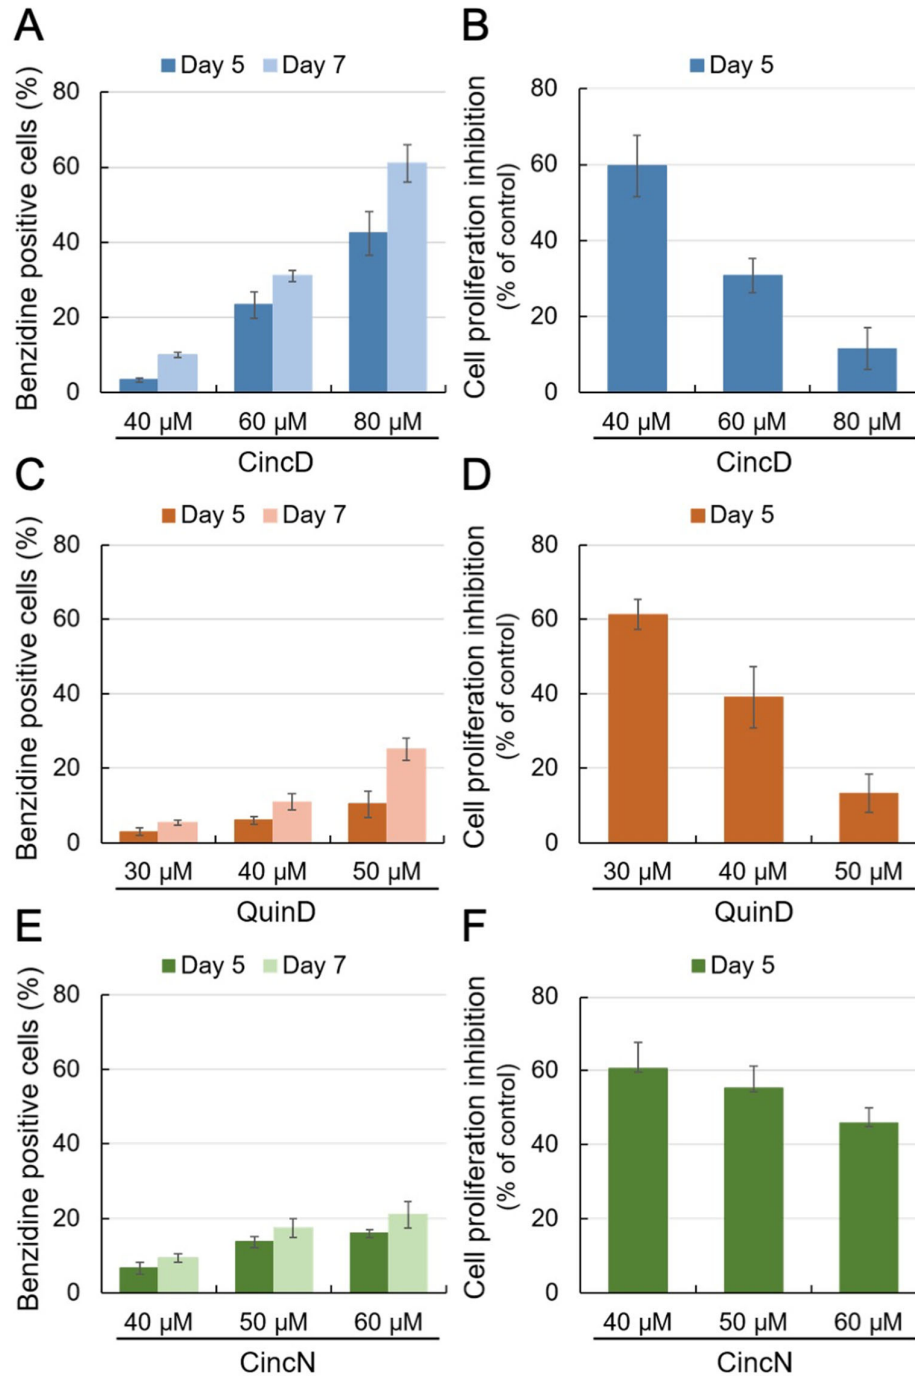

**Figure S2. Effects of cinchonidine, quinidine and cinchonine on in vitro differentiation and proliferation of K562 cells.** K562 cells have been cultured in the absence or in the presence of the indicated concentrations of of cinchonidine (CincD) (**A,B**), quinidine (QuinD) (**C,D**) and cinchonine (CincN) (**E,F**). After 5 and 7 days the proportion of benzidine positive cells (**A,C,E**) and the number of cells/ml (**B,D,F**) were determined as indicated. The proportion of benzidine-positive cells in control untreated cultures never exceeded 2%.

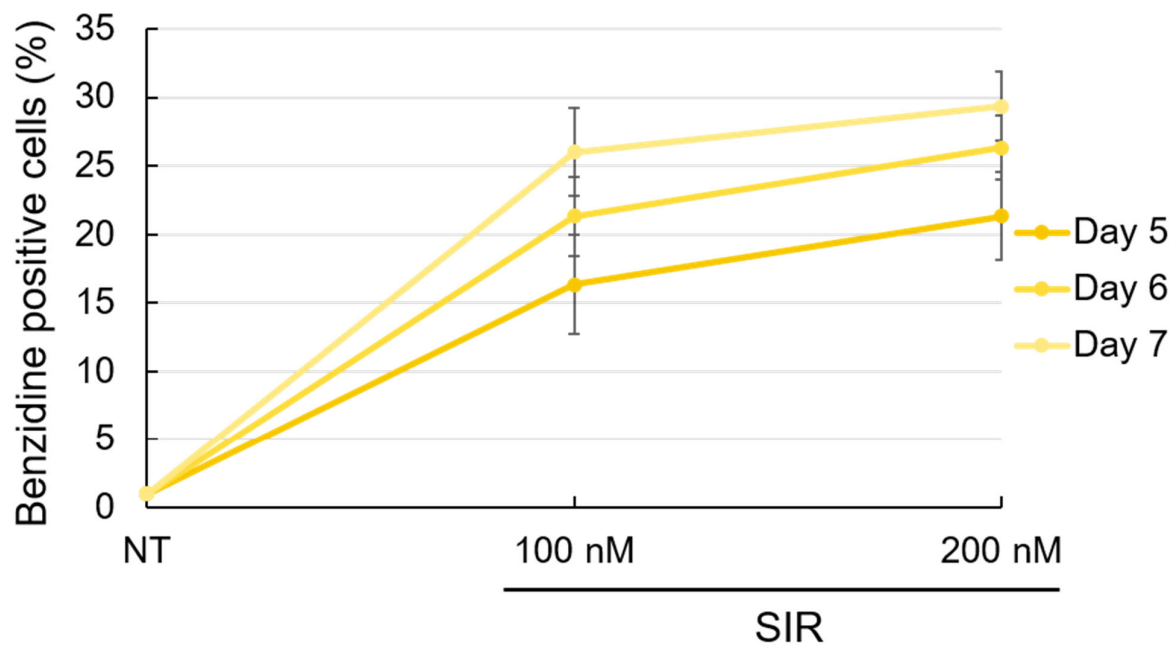

**Figure S3. Effects of sirolimus on in vitro differentiation of K562 cells.** K562 cells have been cultured in the absence or in the presence of the indicated concentrations of sirolimus for the indicated length of time (days) and the proportion of benzidine-positive cells determined. NT = untreated cells.

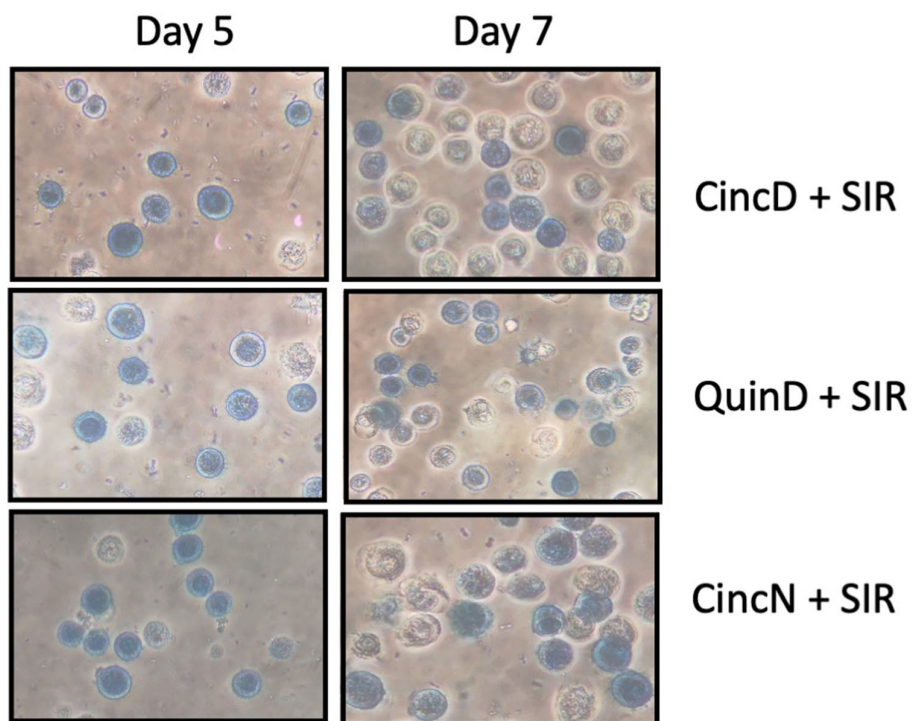

**Figure S4. Benzidine positive cells in K562 cell cultures treated for 5 and 7 days with CincD + SIR, QuinD + SIR and CincN + SIR combinations.** SIR was used at 200 nM; CincD, QuinD and CincN at 40  $\mu$ M. Magnitude: 40 $\times$ .

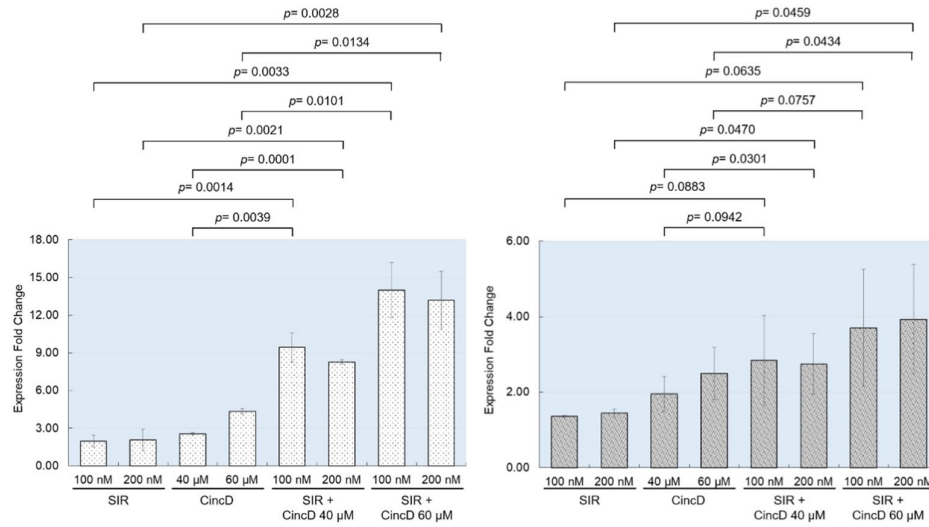

**Figure S5. Effects of cinchonidine on  $\alpha$ -globin (left) and  $\gamma$ -globin (right) mRNAs.** K562 cells were cultured with the indicated concentrations of SIR, CincD, CincD plus SIR. After 5 days of treatment, RNA was isolated and RT-qPCR performed using primers amplifying  $\alpha$ -globin (left) and  $\gamma$ -globin (right) sequences. The increase of expression of  $\alpha$ -globin and  $\gamma$ -globin mRNAs is presented as fold change in respect to control untreated cells. The data represent the average  $\pm$  S.E.M. ( $n = 3$ ).

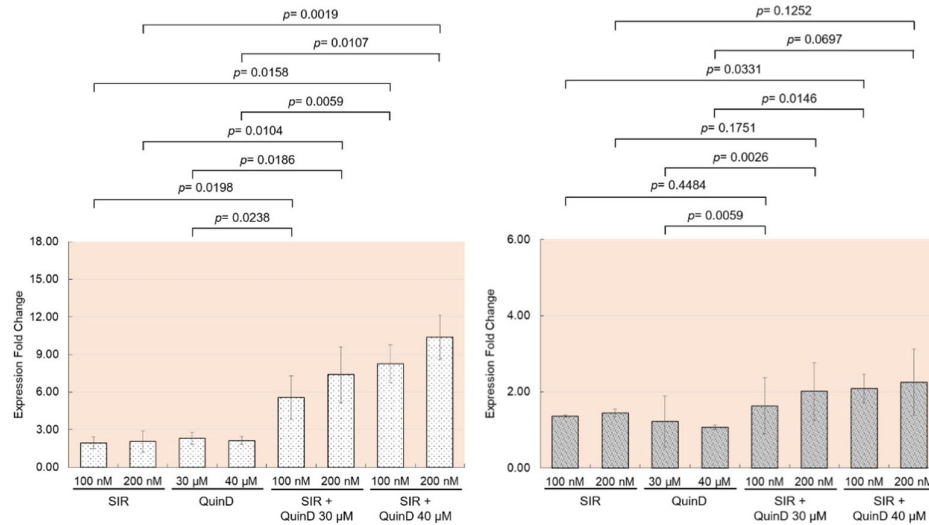

**Figure S6. Effects of quinidine on  $\alpha$ -globin (left) and  $\gamma$ -globin (right) mRNAs.** K562 cells were cultured with the indicated concentrations of SIR, QuinD, QuinD plus SIR. After 5 days of treatment, RNA was isolated and RT-qPCR performed using primers amplifying  $\alpha$ -globin (left) and  $\gamma$ -globin (right) sequences. The increase of expression of  $\alpha$ -globin and  $\gamma$ -globin mRNAs is presented as fold change in respect to control untreated cells. The data represent the average  $\pm$  S.E.M. ( $n = 3$ ).

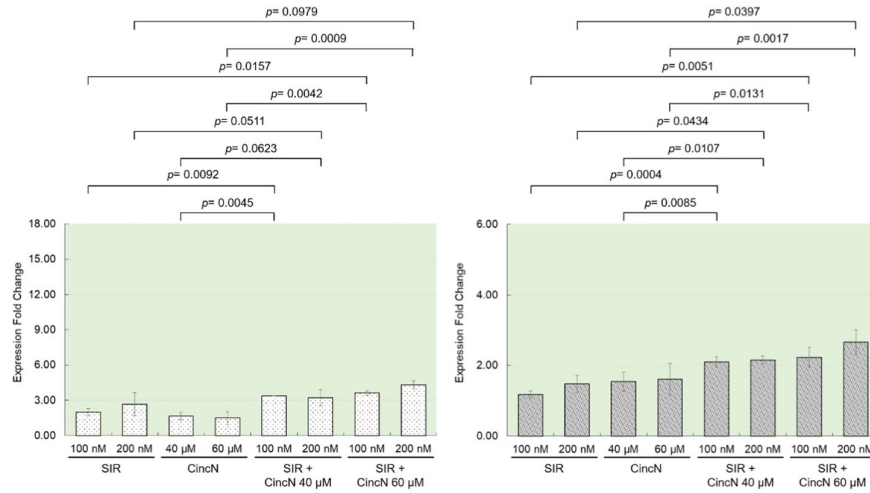

**Figure S7. Effects of cinchonine on  $\alpha$ -globin (left) and  $\gamma$ -globin (right) mRNAs.** K562 cells were cultured with the indicated concentrations of SIR, CincN, CincN plus SIR. After 5 days of treatment, RNA was isolated and RT-qPCR performed using primers amplifying  $\alpha$ -globin (left) and  $\gamma$ -globin (right) sequences. The increase of expression of  $\alpha$ -globin and  $\gamma$ -globin mRNAs is presented as fold change in respect to control untreated cells. The data represent the average  $\pm$  S.E.M. ( $n = 3$ ).

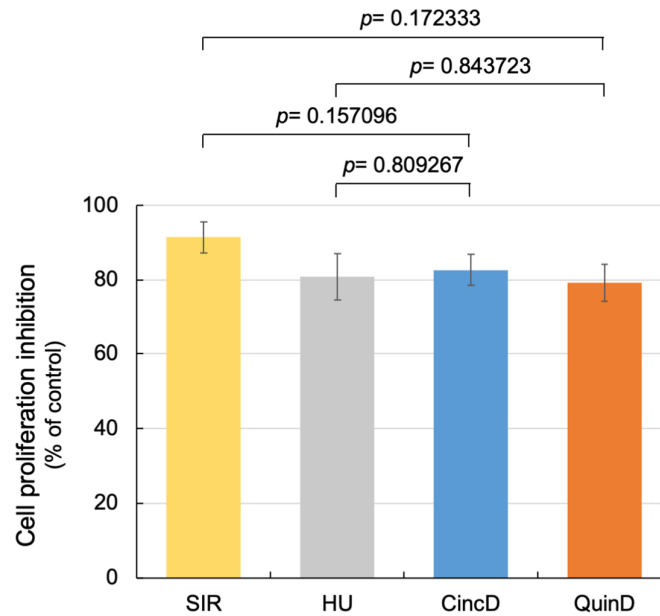

**Figure S8. Effects of sirolimus, hydroxyurea, cinchonidine and quinidine on in vitro proliferation of ErPCs from  $\beta$ -thalassemia patients.** ErPCs were treated as described in the main text with 100 nM sirolimus (SIR), 100  $\mu$ M hydroxyurea (HU), 60  $\mu$ M cinchonidine (CincD) and 30  $\mu$ M quinidine (Quind). The results are expressed as mean  $\pm$  S.E.M. of cell number/ml with respect to control untreated cells (= 100) (10 independent experiments performed).

## Supplementary Tables

| Supplementary Table S1. Effects of cinchonidine (CincD) and quinidine (QuinD) on fetal hemoglobin (HbF) produced by ErPCs from $\beta$ -thalassemia patients |                                   |                                       |       |       |       |       |
|--------------------------------------------------------------------------------------------------------------------------------------------------------------|-----------------------------------|---------------------------------------|-------|-------|-------|-------|
| patients                                                                                                                                                     | genotype                          | HbF (% of total hemoglobins produced) |       |       |       |       |
|                                                                                                                                                              |                                   | NT                                    | SIR   | CincD | QuinD | HU    |
| 1                                                                                                                                                            | $\beta^039/\beta^+IVSI-110$       | 34.82                                 | 40.27 | 36.70 | 38.14 | 37.94 |
| 2                                                                                                                                                            | $\beta^039/\beta^+IVSI-110$       | 26.52                                 | 30.93 | 28.17 | 30.70 | 29.97 |
| 3                                                                                                                                                            | $\beta^+IVSI-110/\beta^+IVSI-110$ | 14.29                                 | 14.16 | 13.29 | 15.17 | 15.19 |
| 4                                                                                                                                                            | $\beta^039/\beta^+IVSI-110$       | 27.47                                 | 34.96 | 32.19 | 39.49 | 33.62 |
| 5                                                                                                                                                            | $\beta^039/\beta^039$             | 30.47                                 | 42.18 | 40.57 | 45.50 | 37.22 |
| 6                                                                                                                                                            | $\beta^039/\beta^039$             | 64.88                                 | 72.60 | 71.26 | 73.10 | 67.08 |
| 7                                                                                                                                                            | $\beta^039/\beta^+IVSI-110$       | 19.27                                 | 26.03 | 22.32 | 23.34 | 25.87 |
| 8                                                                                                                                                            | $\beta^+IVSI-110/\beta^+IVSI-110$ | 8.32                                  | 13.40 | 12.20 | 15.06 | 12.61 |
| 9                                                                                                                                                            | $\beta^039/\beta^039$             | 30.73                                 | 34.54 | 36.81 | 42.47 | 31.29 |
| 10                                                                                                                                                           | $\beta^039/\beta^+IVSI-110$       | 12.75                                 | 9.83  | 21.62 | 27.80 | 11.65 |

NT = untreated ErPCs; SIR, sirolimus; HU, hydroxyurea. Experimental conditions are reported in Figure 6.

| Supplementary Table S2. Effects of combined treatments on fetal hemoglobin (HbF) produced by ErPCs from $\beta$ -thalassemia patients |                                   |                                       |       |       |       |             |             |       |
|---------------------------------------------------------------------------------------------------------------------------------------|-----------------------------------|---------------------------------------|-------|-------|-------|-------------|-------------|-------|
| patients                                                                                                                              | genotype                          | HbF (% of total hemoglobins produced) |       |       |       |             |             |       |
|                                                                                                                                       |                                   | NT                                    | SIR   | CincD | QuinD | SIR + CincD | SIR + QuinD | HU    |
| 2                                                                                                                                     | $\beta^039/\beta^+IVSI-110$       | 26.52                                 | 30.93 | 28.17 | 30.70 | 30.27       | 32.70       | 29.97 |
| 7                                                                                                                                     | $\beta^039/\beta^+IVSI-110$       | 19.27                                 | 26.03 | 22.32 | 23.34 | 23.56       | 23.72       | 25.87 |
| 8                                                                                                                                     | $\beta^+IVSI-110/\beta^+IVSI-110$ | 8.32                                  | 13.4  | 12.2  | 15.06 | 18.14       | 17.62       | 12.61 |
| 9                                                                                                                                     | $\beta^039/\beta^039$             | 30.73                                 | 34.54 | 36.81 | 42.47 | 43.74       | 42.30       | 31.29 |
| 10                                                                                                                                    | $\beta^039/\beta^+IVSI-110$       | 12.75                                 | 9.83  | 21.62 | 27.80 | 29.93       | 40.25       | 11.65 |
|                                                                                                                                       |                                   |                                       |       |       |       |             |             |       |

NT = untreated ErPCs; SIR, sirolimus; HU, hydroxyurea. Experimental conditions are reported in Figure 7.

| Supplementary Table S3. Effects of cinchonidine (CincD) and quinidine (QuinD) on accumulation of free $\alpha$ -globin chains by ErPCs from $\beta$ -thalassemia patients |                                   |                                                         |      |       |       |      |
|---------------------------------------------------------------------------------------------------------------------------------------------------------------------------|-----------------------------------|---------------------------------------------------------|------|-------|-------|------|
| patients                                                                                                                                                                  | genotype                          | $\alpha$ -globin peak (% of total hemoglobins produced) |      |       |       |      |
|                                                                                                                                                                           |                                   | -                                                       | SIR  | CincD | QuinD | HU   |
| 1                                                                                                                                                                         | $\beta^039/\beta^+IVSI-110$       | 4.35                                                    | 1.13 | 2.45  | 2.24  | 3.40 |
| 2                                                                                                                                                                         | $\beta^039/\beta^+IVSI-110$       | 3.36                                                    | 3.15 | 2.79  | 2.60  | 3.08 |
| 3                                                                                                                                                                         | $\beta^+IVSI-110/\beta^+IVSI-110$ | 3.14                                                    | 1.70 | 1.86  | 1.66  | 4.24 |
| 4                                                                                                                                                                         | $\beta^039/\beta^+IVSI-110$       | 8.23                                                    | 6.97 | 2.56  | 2.97  | 8.38 |
| 5                                                                                                                                                                         | $\beta^039/\beta^039$             | 0.77                                                    | 2.55 | 2.02  | 1.24  | 4.79 |
| 6                                                                                                                                                                         | $\beta^039/\beta^039$             | 6.18                                                    | 3.33 | 1.34  | 1.56  | 3.80 |
| 7                                                                                                                                                                         | $\beta^039/\beta^+IVSI-110$       | 3.34                                                    | 2.78 | 2.65  | 2.76  | 2.83 |
| 8                                                                                                                                                                         | $\beta^+IVSI-110/\beta^+IVSI-110$ | 3.51                                                    | 3.45 | 2.53  | 1.52  | 4.55 |
| 9                                                                                                                                                                         | $\beta^039/\beta^039$             | 10.23                                                   | 7.99 | 5.34  | 2.12  | 7.49 |
| 10                                                                                                                                                                        | $\beta^039/\beta^+IVSI-110$       | 1.20                                                    | 0.79 | 0.49  | 0.45  | 0.39 |

NT = untreated ErPCs; SIR, sirolimus; HU, hydroxyurea. Experimental conditions are reported in Figure 8.
